# Supplementary material for: Exploration and investigation of various solid forms of an anti-glaucoma drug – dichlorphenamide
Source: Royal Society of Chemistry journal article supplement (doi:10.1039/d2ce01690g), 2023-01-01

## *Supporting Information For*

# Exploration and investigation of various solid forms of an anti-glaucoma drug - Dichlorphenamide

Ananya Kar,<sup>a,1</sup> Lopamudra Giri,<sup>a,1</sup> Gowtham Kenguva,<sup>a</sup> Smruti Rekha Rout<sup>a</sup>, and Rambabu Dandela<sup>\*a</sup>

<sup>a</sup>Department of Industrial and Engineering Chemistry, Institute of Chemical Technology- IndianOil Odisha Campus, Bhubaneswar, India. E-mail: [r.dandela@iocb.ictmumbai.edu.in](mailto:r.dandela@iocb.ictmumbai.edu.in)

<sup>1</sup>Ananya Kar and Lopamudra Giri contributed equally to this work as first authors.

| <b>Contents</b>                                                                                                                                                                                                                               | <b>Page No.</b> |
|-----------------------------------------------------------------------------------------------------------------------------------------------------------------------------------------------------------------------------------------------|-----------------|
| <b>Figure S1.</b> Depiction of the emergence of different forms under various reaction conditions (a) rotary evaporation, (b) hot-melt extrusion, (c) liquid-assisted grinding (LAG) (d) LAG followed by slow-evaporation and (e) sonication. | S2-S4           |
| <b>Table S1.</b> Hydrogen bond distances (Å) and angles (o) of various forms of DCF.                                                                                                                                                          | S4              |
| <b>Figure S2.</b> Stability of (a) Form II (b) Form III and (c) DCF.dioxane in different solvent media.                                                                                                                                       | S5-S6           |
| <b>Figure S3.</b> VT-PXRD overlay of (a) Form II (b) Form III and (c) DCF.dioxane.                                                                                                                                                            | S7-S8           |
| Details of the solubility parameters of solid forms of DCF                                                                                                                                                                                    | S8-S9           |

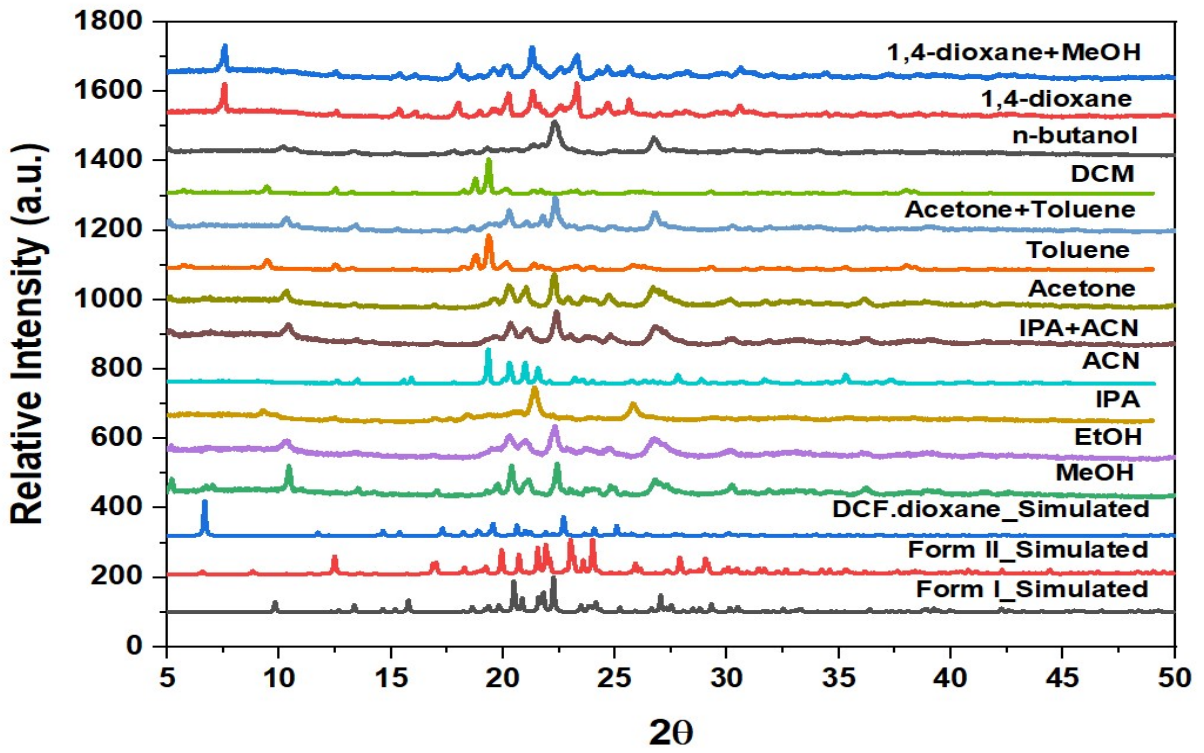

(a)

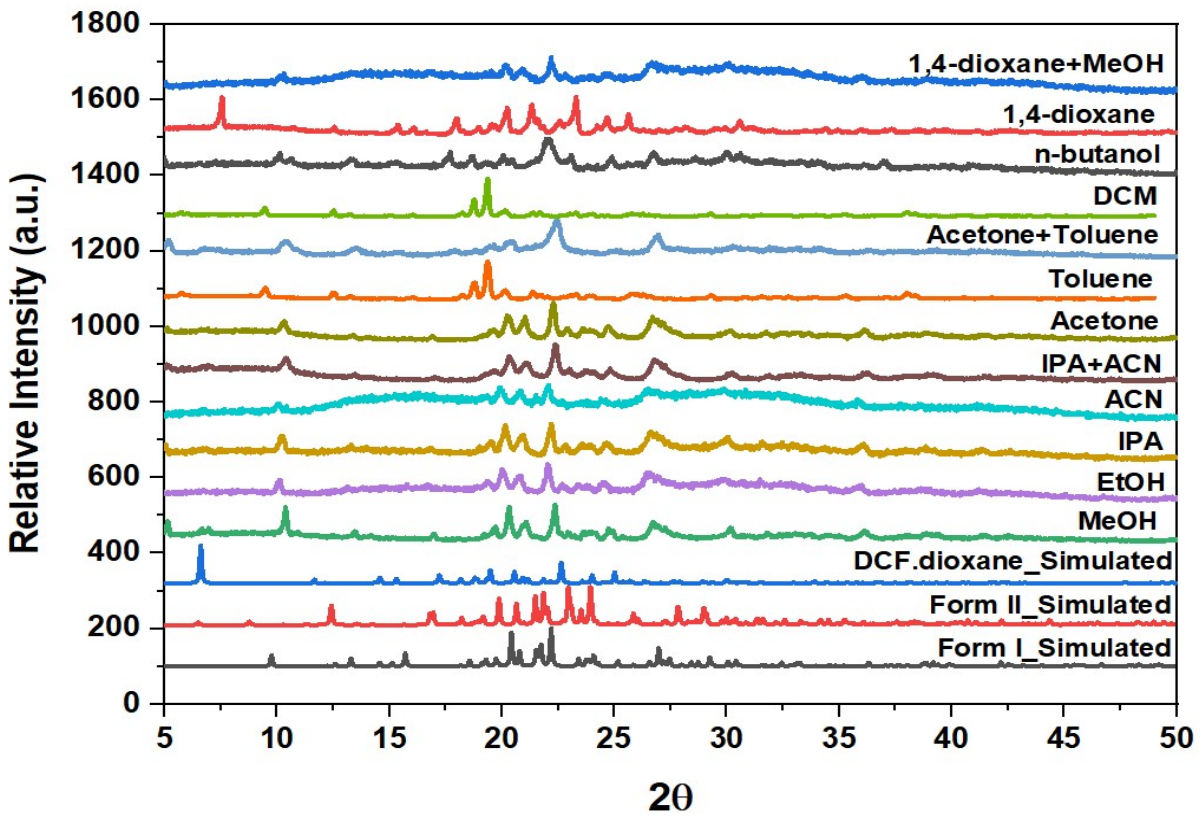

(b)

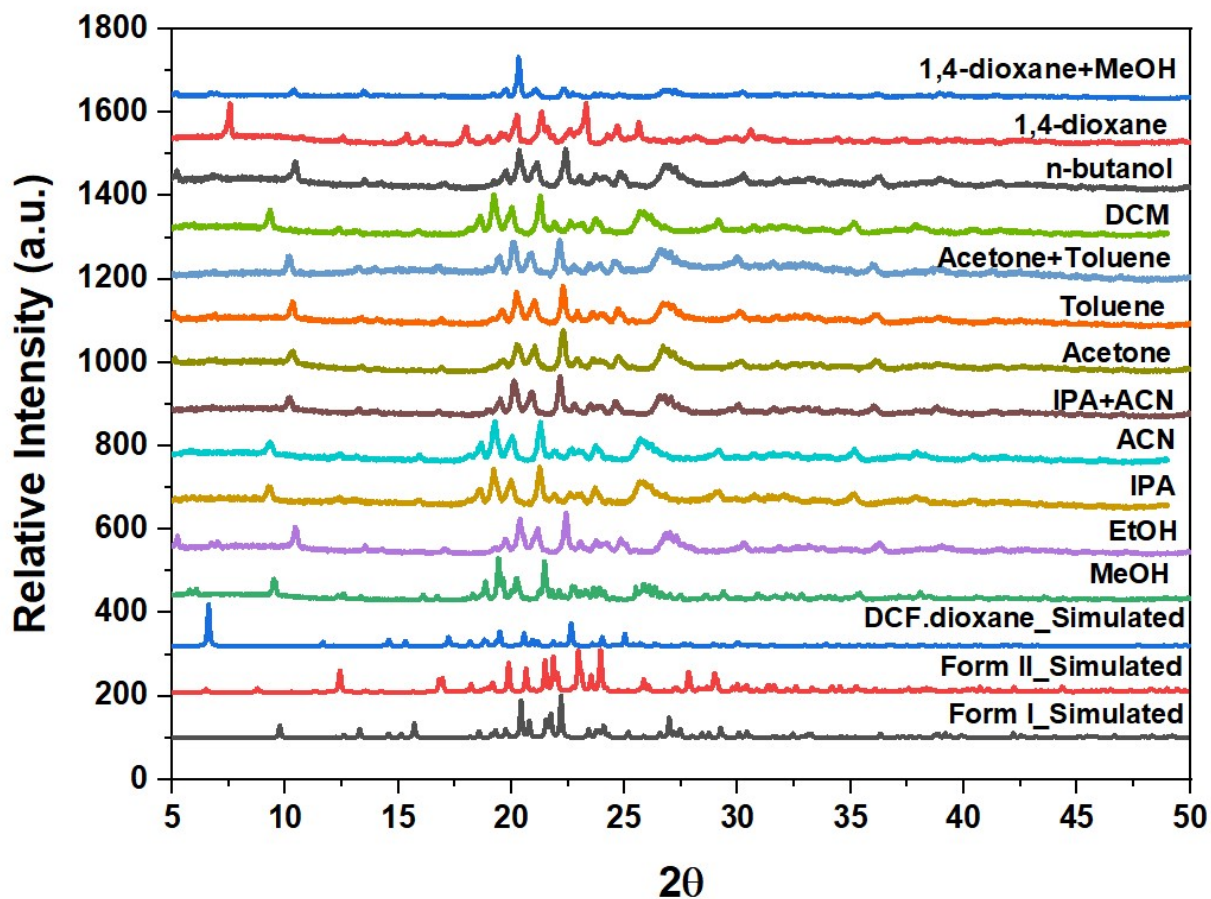

(c)

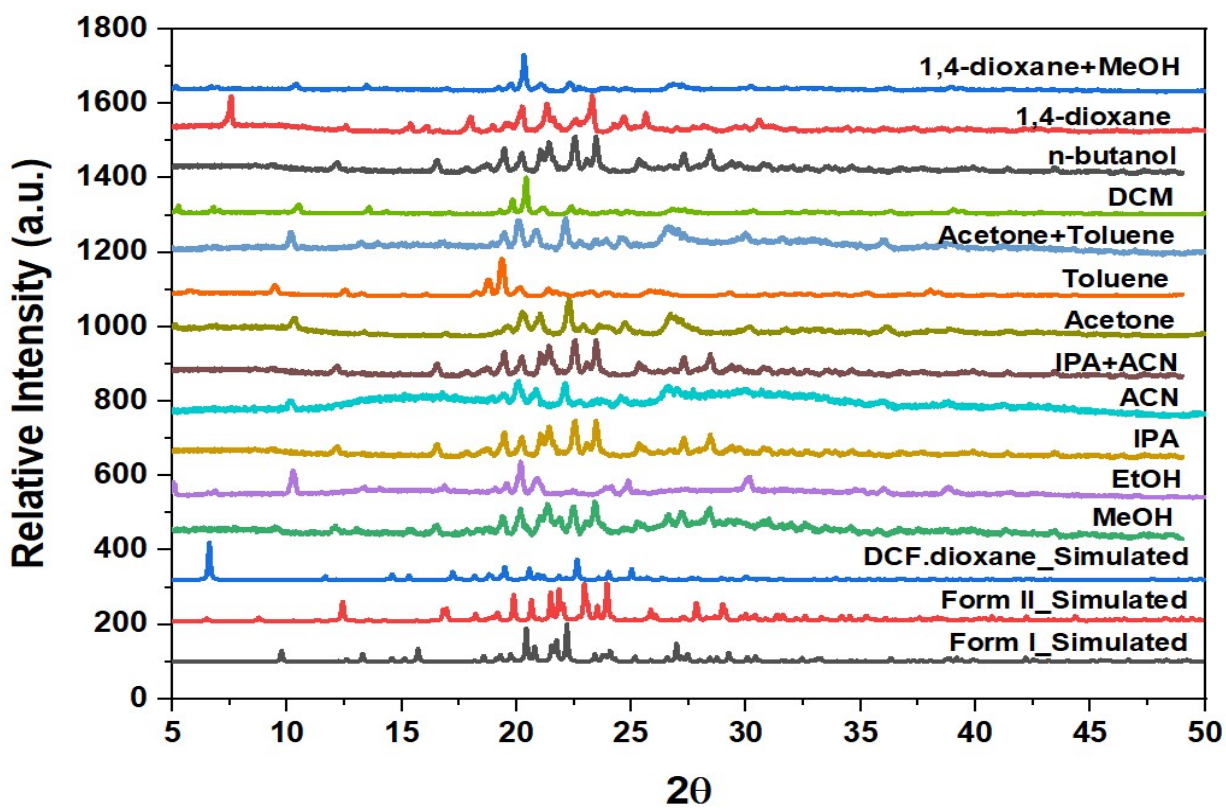

(d)



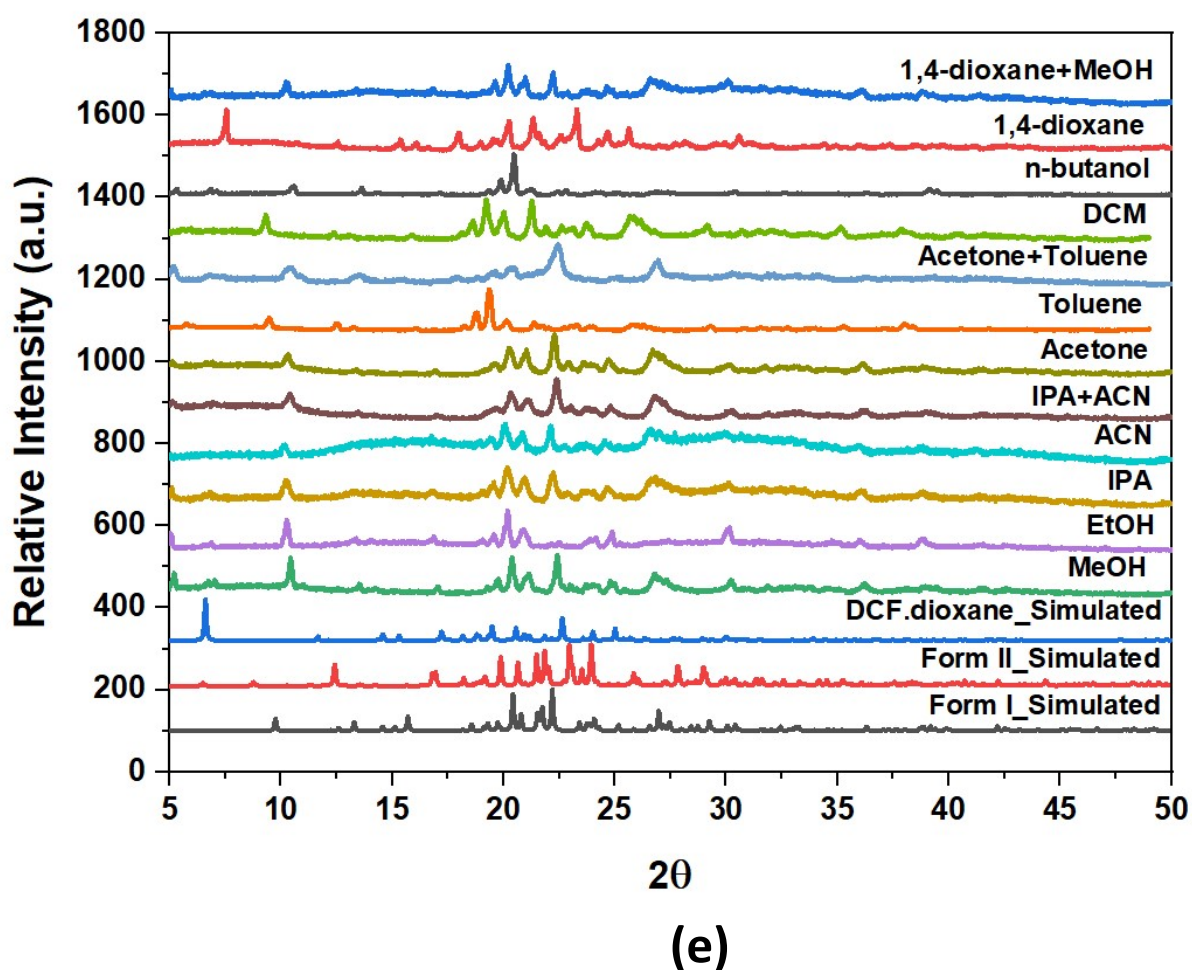

**Figure S1.** Depiction of the emergence of different forms under various reaction conditions (a) rotary evaporation, (b) hot-melt extrusion, (c) liquid-assisted grinding (LAG) (d) LAG followed by slow-evaporation and (e) sonication.

**Table S1.** Hydrogen bond distances (Å) and angles (°) of various forms of DCF.

| Solid forms        | $D-H\cdots A$ (Å)  | $D-H$ (Å) | $H\cdots A$ (Å) | $D-A$ (Å) | $D-H\cdots A$ (°) | Symmetry             |
|--------------------|--------------------|-----------|-----------------|-----------|-------------------|----------------------|
| <b>Form I</b>      | N2-H4 $\cdots$ O4  | 0.860     | 2.15            | 2.980(1)  | 162               | 1/2-x, -1/2+y, 1/2-z |
|                    | N1-H6 $\cdots$ O1  | 0.860     | 2.16            | 2.903(1)  | 145               | -1/2+x, -1/2+y, z    |
|                    | N2-H3 $\cdots$ O3  | 0.860     | 2.36            | 2.985(1)  | 129               | -1/2+x, 1/2+y, z     |
|                    | N1-H5 $\cdots$ O2  | 0.859     | 2.93            | 2.931(1)  | 123               | 1/2-x, -1/2+y, 1/2-z |
|                    | C3-H2 $\cdots$ O3  | 1.066     | 3.53            | 3.536(1)  | 161               | 1-x, 1-y, 1-z        |
| <b>Form II</b>     | N4-H7 $\cdots$ O4  | 0.851     | 2.03            | 2.881(1)  | 174               | -1+x, y, z           |
|                    | N1-H8 $\cdots$ O6  | 0.759     | 2.25            | 2.972(1)  | 160               | -x, -1/2+y, 1/2-z    |
|                    | N4-H3 $\cdots$ O8  | 0.801     | 2.30            | 3.051(2)  | 157               | 1-x, -1/2+y, 1/2-z   |
|                    | N2-H10 $\cdots$ O2 | 0.773     | 2.40            | 3.171(1)  | 174               | -x, -1/2+y, 1/2-z    |
| <b>DCF.dioxane</b> | N1-H1A $\cdots$ O6 | 0.890     | 1.95            | 2.833(1)  | 167               | x, y, z              |
|                    | N2-H2C $\cdots$ O5 | 0.890     | 2.02            | 2.880(3)  | 162               | 1-x, 1-y, 2-z        |
|                    | N1-H1B $\cdots$ O4 | 0.890     | 2.58            | 3.342(1)  | 144               | 1-x, -y, 1-z         |

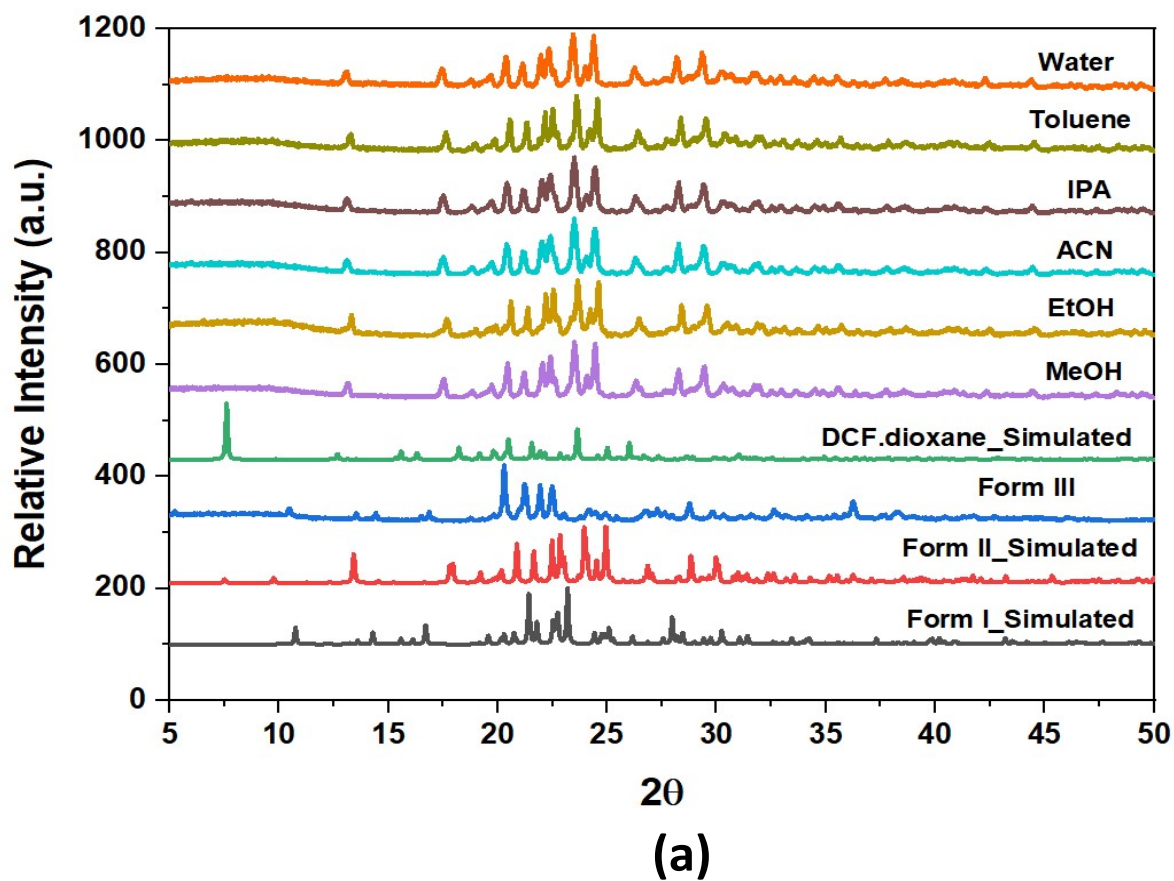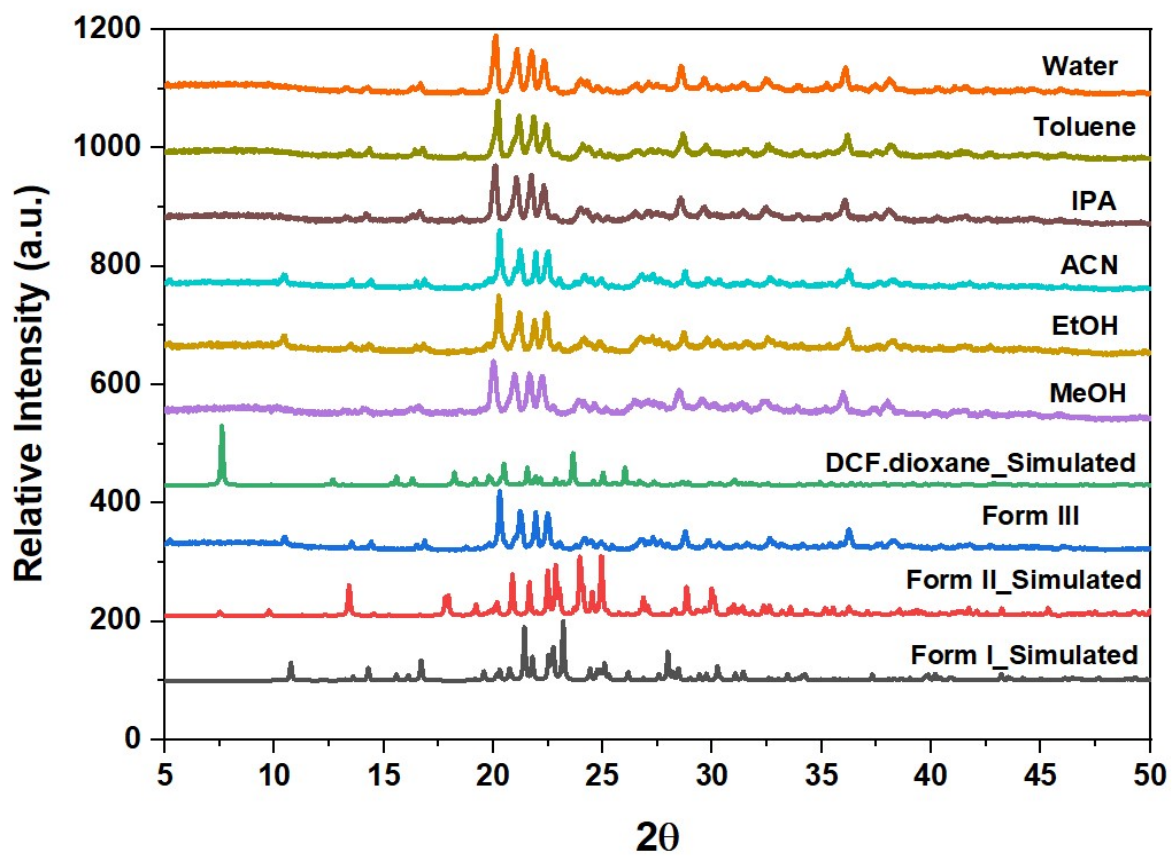

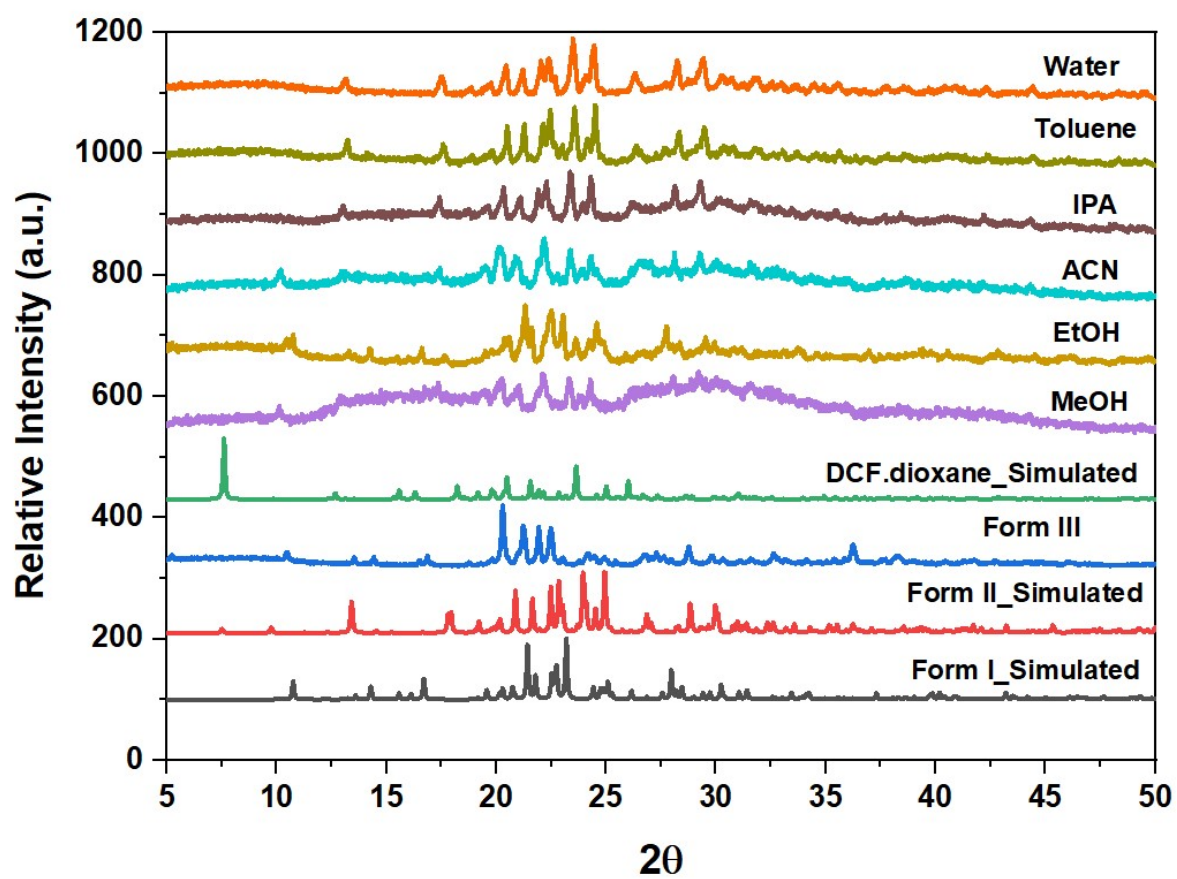

(c)

Figure S2. Stability of (a) Form II (b) Form III and (c) DCF.dioxane in different solvent media.

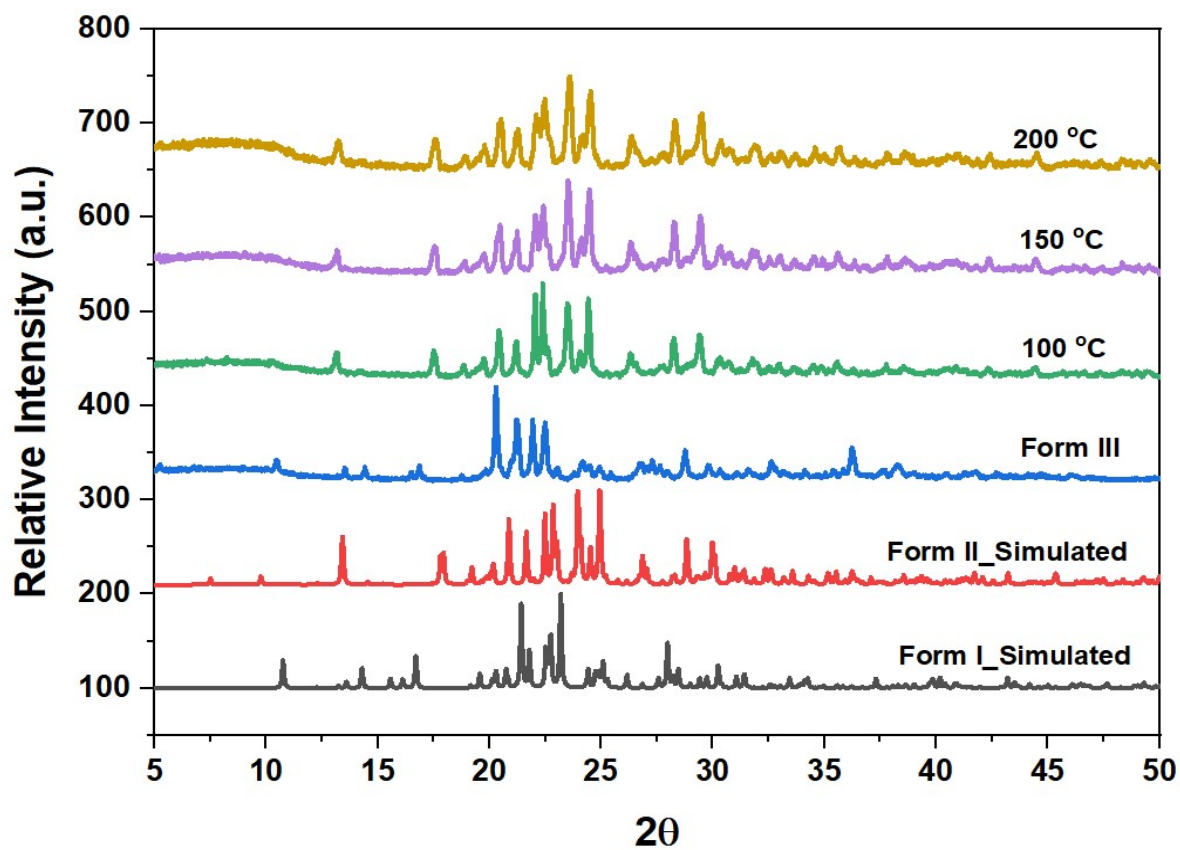

(a)

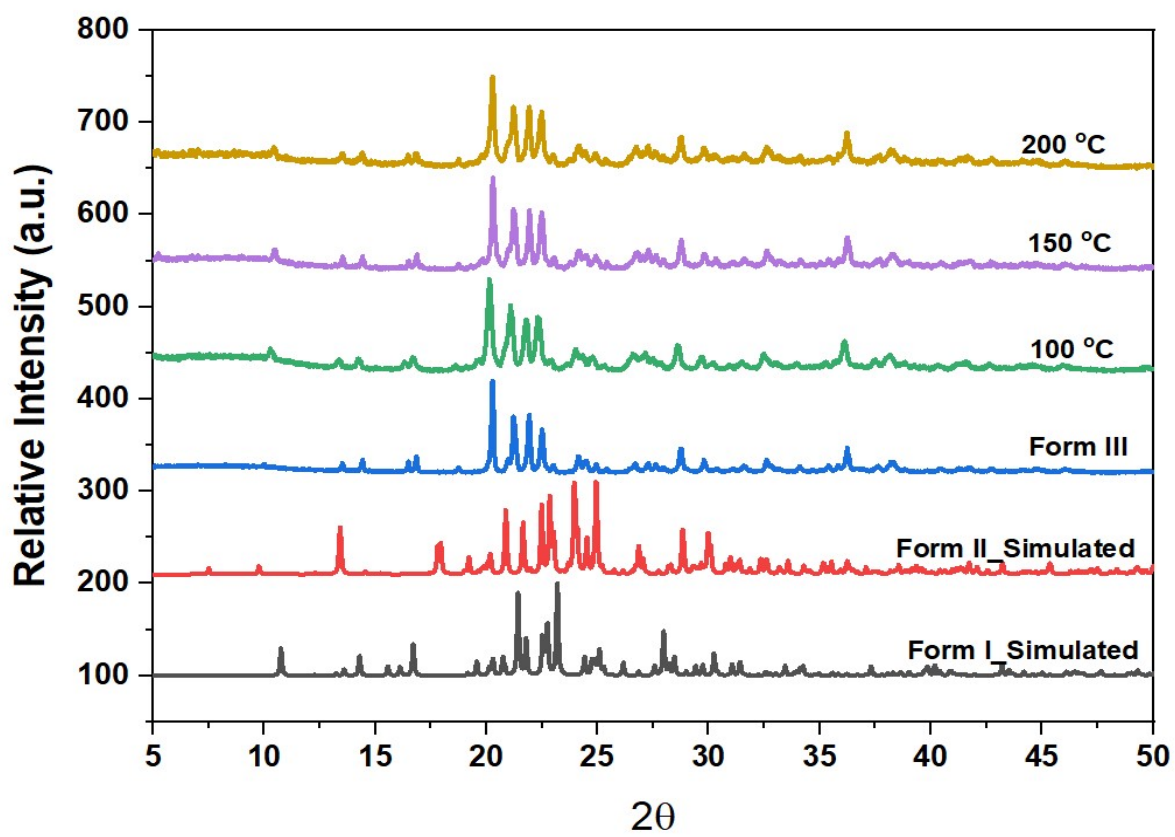

(b)



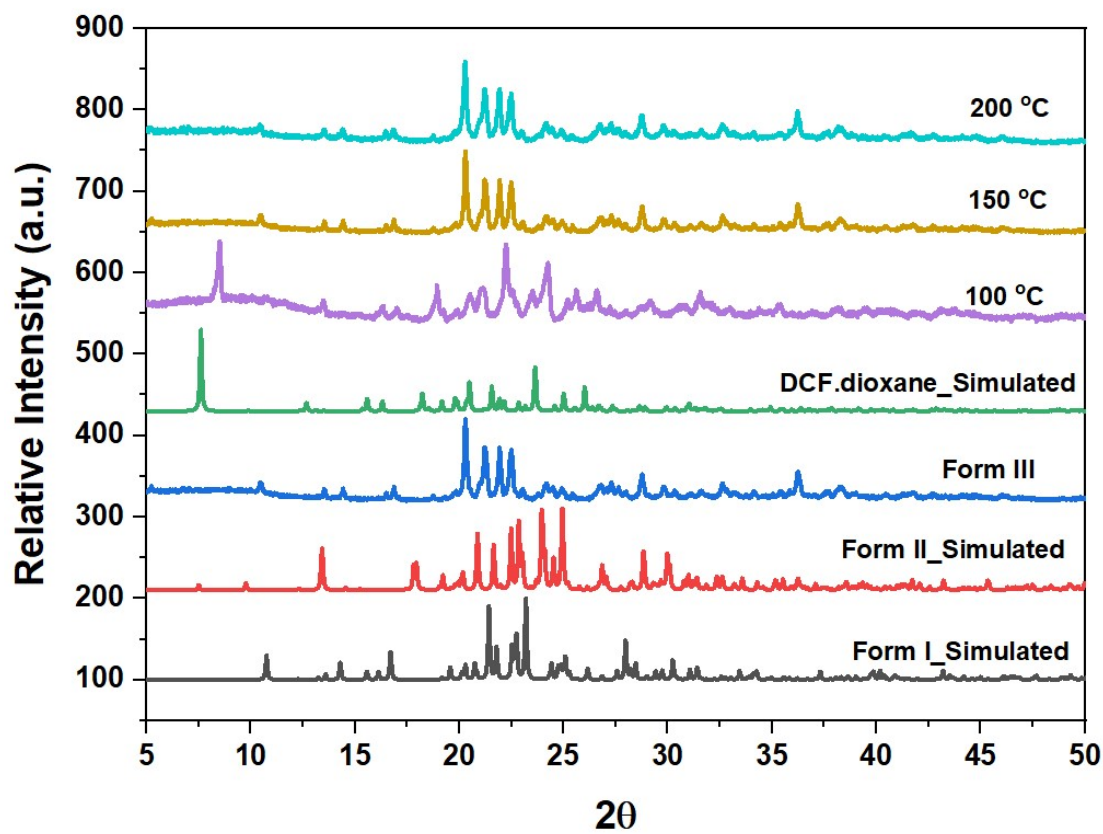

(c)

Figure S3. VT-PXRD overlay of (a) Form II (b) Form III and (c) DCF.dioxane.

**Details of the solubility parameters of solid forms of DCF**

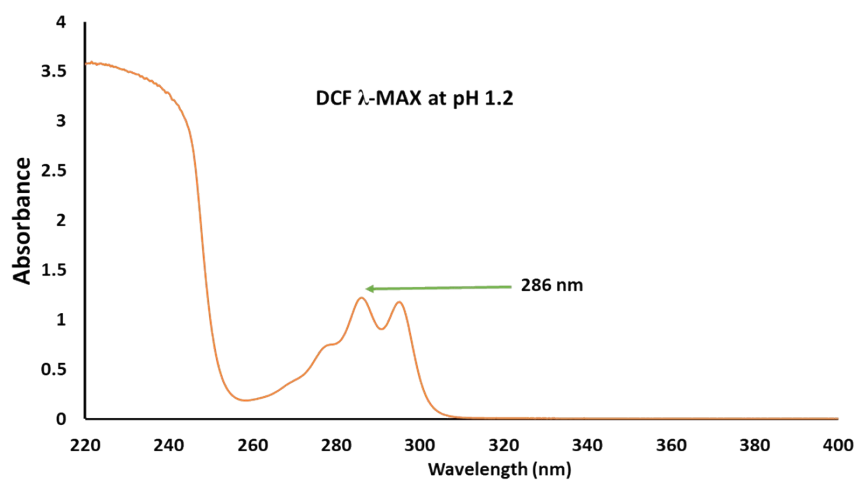



Calibration graph of DCF at pH 1.2

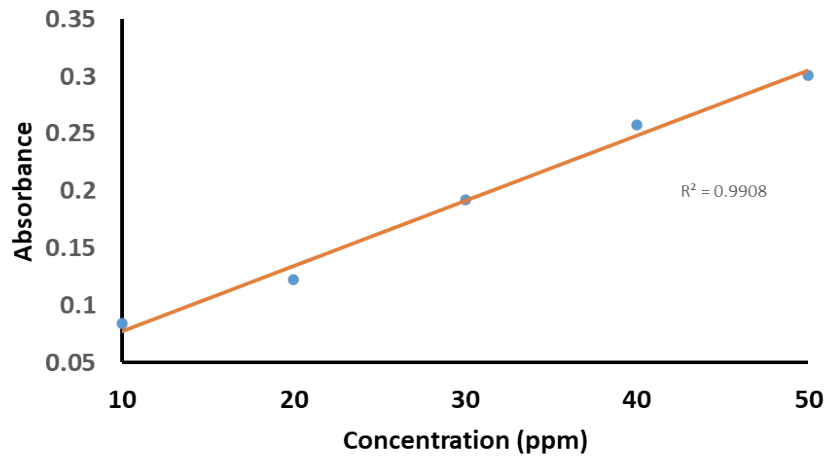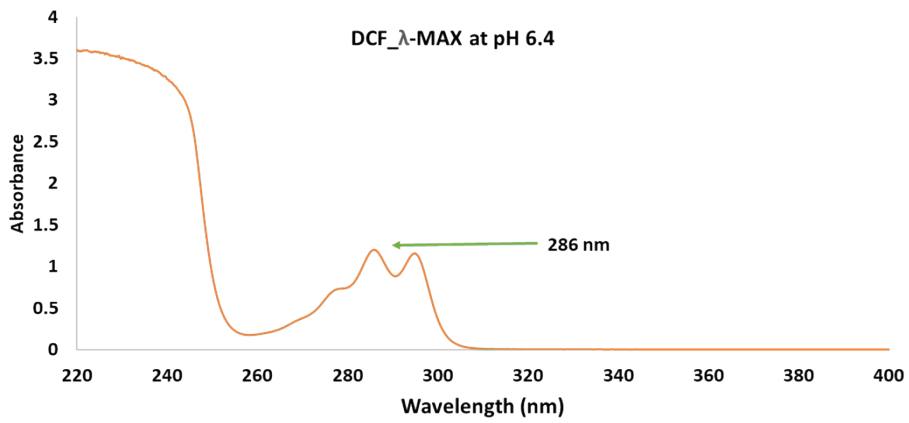

Calibration graph of DCF at pH 6.4

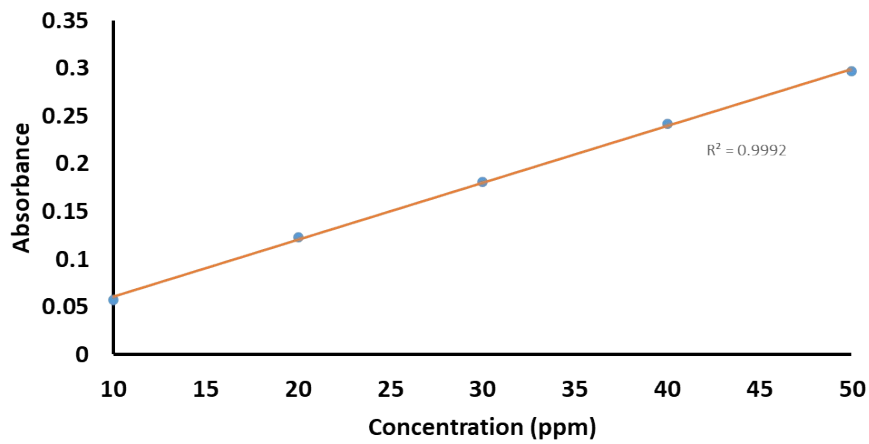

Supplement: d2ce01690g1.pdf [file d2ce01690g1.pdf]
